# Supplementary material for: STAT3 is critical for skeletal development and bone homeostasis by regulating osteogenesis
Source: PubMed Central journal article supplement (PMC8616950; doi:10.1038/s41467-021-27273-w), 2021-11-25
Supplement: 41467_2021_27273_MOESM1_ESM.pdf [file 41467_2021_27273_MOESM1_ESM.pdf]

## Supplementary Figures

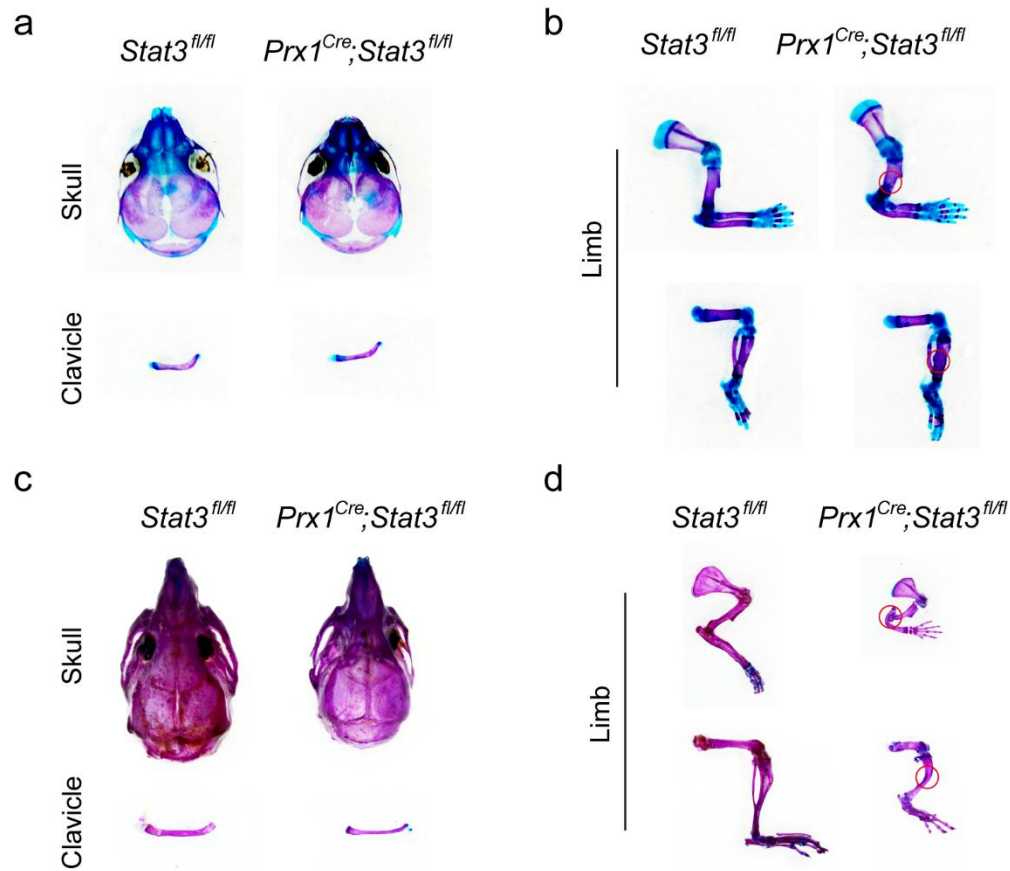

Supplementary Fig.1 **a-b** Skeletal preparations from male *Stat3<sup>fl/fl</sup>* and *Prx1<sup>Cre</sup>;Stat3<sup>fl/fl</sup>* newborns were double-stained with alcian blue and alizarin red S. **c-d** Skeletal preparations from 8-week-old male *Stat3<sup>fl/fl</sup>* and *Prx1<sup>Cre</sup>;Stat3<sup>fl/fl</sup>* mice were double-stained with alcian blue and alizarin red S. Red circles represent bone fracture.

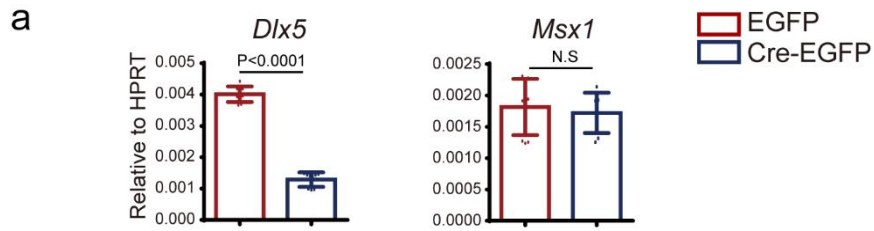

Supplementary Fig.2 **a** BMSCs from 4-week-old male *Stat3<sup>fl/fl</sup>* mice were infected with adenovirus expressing EGFP or Cre-EGFP for 4hours then induced by osteogenic medium, the relative mRNA levels of *Dlx5* and *Msx1* were quantified after 14 days of culture in osteogenic medium. n=9. Two-tailed Student's t test. Data represent the mean  $\pm$  s.d. Source data are provided in the Source Data File.

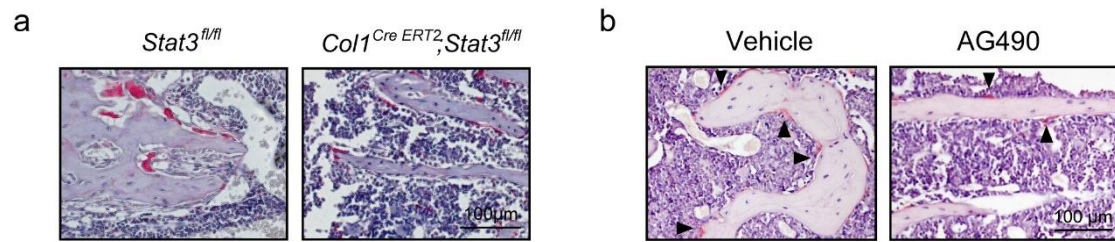

Supplementary Fig.3 **a** TRAP staining of femurs from 6-week-old male *Stat3<sup>fl/fl</sup>* and *Col1<sup>Cre ERT2</sup>; Stat3<sup>fl/fl</sup>* mice. **b** TRAP staining of femurs from 9-week-old male mice with or without AG490. Black triangles indicate TRAP<sup>+</sup>- multinucleated osteoclasts. The TRAP staining were repeated twice to similar results.

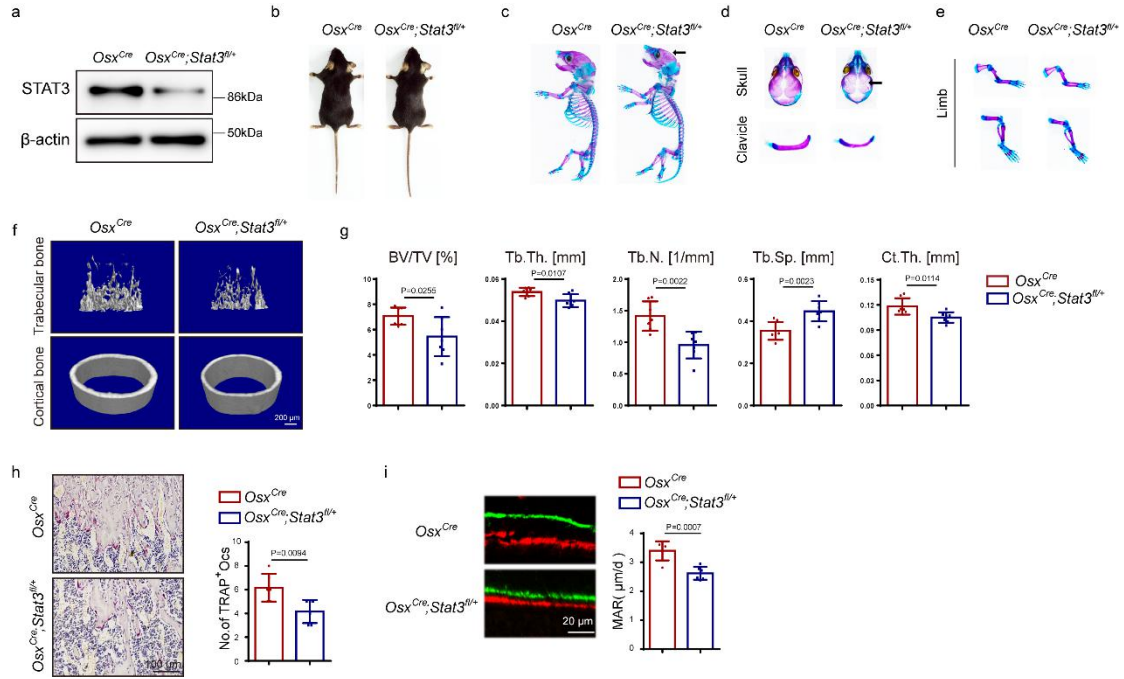

**Supplementary Fig.4 Heterozygous mutation in the STAT3 gene induced skeletal deformities.** **a** Expression of STAT3 in BMSCs from 4-week-old male *Osx<sup>Cre</sup>* and *Osx<sup>Cre</sup>;Stat3<sup>fl/+</sup>* mice cultured in osteogenic medium for 7 days. The experiment was performed twice to similar results. **b** Representative views of 8-week-old male *Osx<sup>Cre</sup>* and *Osx<sup>Cre</sup>;Stat3<sup>fl/+</sup>* mice. **c-e** Skeletal preparations from male *Osx<sup>Cre</sup>* and *Osx<sup>Cre</sup>;Stat3<sup>fl/+</sup>* newborns were double-stained with alcian blue and alizarin red S. Arrows indicate calvarial lesions. **f** Micro-CT images of distal femurs from 4-week-old male *Osx<sup>Cre</sup>* and *Osx<sup>Cre</sup>;Stat3<sup>fl/+</sup>* mice. **g** Quantitative parameters of micro-CT, including BV/TV, tTb.Th., Tb.N., Tb.Sp., and Ct.Th.. n=7. **h** TRAP staining of femurs from 4-week-old male *Osx<sup>Cre</sup>* and *Osx<sup>Cre</sup>;Stat3<sup>fl/+</sup>* mice and analysis of the number of TRAP<sup>+</sup>-multinucleated osteoclasts. n=6. **i** Representative images of calcein-alizarin red S double labeling of femurs from 4-week-old male *Osx<sup>Cre</sup>* and *Osx<sup>Cre</sup>;Stat3<sup>fl/+</sup>* mice and quantitative parameters mineral apposition rate (MAR). n=6. Two-tailed Student's t test. Data represent the mean  $\pm$  s.d. Source data are provided in the Source Data File.

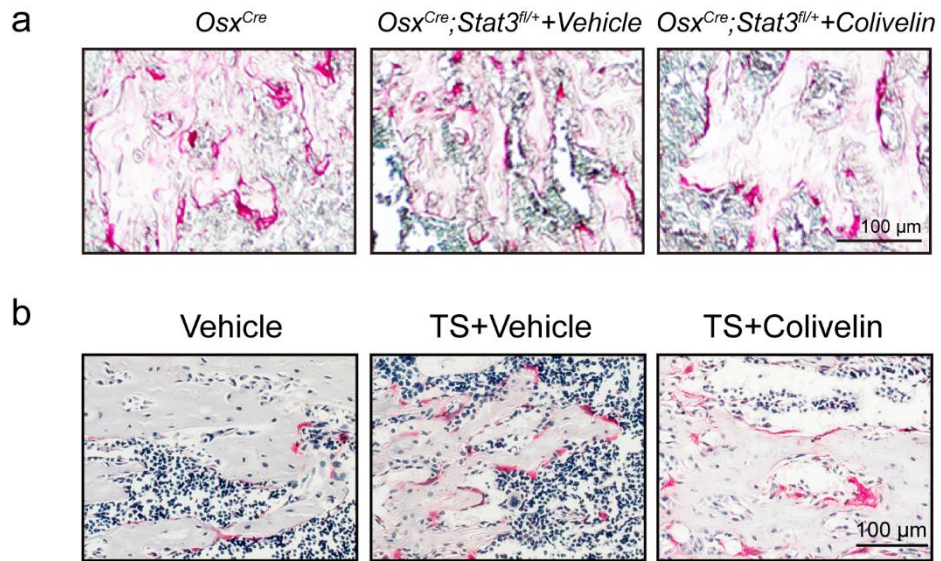

Supplementary Fig.5 **a** TRAP staining of femurs from 4-week-old male *Osx<sup>Cre</sup>*, *Osx<sup>Cre</sup>;Stat3<sup>fl/+</sup>+Vehicle* and *Osx<sup>Cre</sup>;Stat3<sup>fl/+</sup>+ Colivelin* group mice. **b** TRAP staining of femurs from 5-week-old male Vehicle, TS+Vehicle and TS+Colivelin group mice. The TRAP staining were repeated twice to similar results.

**Supplementary Table 1**

|    | <b>Antibodies</b>    | <b>Sources</b> | <b>Cat. No.</b> | <b>Clone Name</b> | <b>Dilutions</b> | <b>Applications</b> |
|----|----------------------|----------------|-----------------|-------------------|------------------|---------------------|
| 1  | Anti-Dlx5            | Abcam          | EPR4488         | Rabbit monoclonal | 1:1000           | IHC                 |
| 2  | Anti-OPN             | R&D System     | #AF808          | Goat polyclonal   | 1:200            | IF                  |
| 3  | Anti-Stat3           | Santa Cruz     | sc-482          | Rabbit polyclonal | 1:500            | WB                  |
| 4  | Anti-pStat3          | CST            | #9138           | Mouse monoclonal  | 1:1000           | WB                  |
| 5  | Anti-GAPDH           | CST            | #2118           | Rabbit monoclonal | 1:1000           | WB                  |
| 6  | Anti- $\beta$ -Actin | CST            | #4970           | Rabbit monoclonal | 1:1000           | WB                  |
| 7  | Anti-FLAG            | Sigma          | F3165           | Mouse monoclonal  | 1:10000          | Co-IP               |
| 8  | Anti-HA              | Sigma          | H9658           | Mouse monoclonal  | 1:1000           | Co-IP               |
| 9  | Anti-MYC             | Sigma          | SAB4501941      | Rabbit polyclonal | 1:2000           | Co-IP               |
| 10 | Anti-Cy3             | Absin          | abs20028A       | Donkey polyclonal | 1:200            | IF                  |
| 11 | Anti-Stat3           | CST            | #12640          | Rabbit monoclonal | 1:50             | CHIP                |

**Supplementary Table 2**

| <b>S.No.</b> | <b>Gene name<br/>(Mus musculus)</b> | <b>Direction</b> | <b>Sequence</b>               |
|--------------|-------------------------------------|------------------|-------------------------------|
| 1            | <i>HPRT</i>                         | Forward primer   | 5'-GTTAAGCAGTACAGCCCCAAA-3'   |
|              |                                     | Reverse primer   | 5'-AGGGCATATCCAACAACAAACTT-3' |
| 2            | <i>Stat3</i>                        | Forward primer   | 5'-CTTGCCCTTTGGAATGAAG-3'     |
|              |                                     | Reverse primer   | 5'-CAAGTGAAAGTGACCCCTCC-3'    |
| 3            | <i>Runx2</i>                        | Forward primer   | 5'-CCAACCGAGTCATTTAAG-3'      |
|              |                                     | Reverse primer   | 5'-GCTCACGTCGTCATCTTG-3'      |
| 4            | <i>Osteocalcin</i>                  | Forward primer   | 5'-CTTGGTGCACACCTAGCAGA-3'    |
|              |                                     | Reverse primer   | 5'-CTCCCTCATGTGTTGTCCCT-3'    |
| 5            | <i>Alp</i>                          | Forward primer   | 5'-CGGGACTGGTACTCGGATAA-3'    |
|              |                                     | Reverse primer   | 5'-ATTCCACGTCGGTTCTGTTC-3'    |
| 6            | <i>Colla1</i>                       | Forward primer   | 5'-GCTCCTCTTAGGGGCCACT-3'     |
|              |                                     | Reverse primer   | 5'-CCACGTCTCACCATTGGGG-3'     |
| 7            | <i>Bsp</i>                          | Forward primer   | 5'-CGAAGAAGCAGAAGTGGATG-3'    |
|              |                                     | Reverse primer   | 5'-GCTTCTTCTCCGTTGTCTCC-3'    |
| 8            | <i>Dlx5</i>                         | Forward primer   | 5'-TCTCTAGGACTGACGCAAACA-3'   |
|              |                                     | Reverse primer   | 5'-GTTACACGCCATAGGGTCGC-3'    |
| 9            | Msx1                                | Forward primer   | 5'-TCATGGCCGATCACAGGAAG-3'    |
|              |                                     | Reverse primer   | 5'-GGAGTCCTCCGACTGAGAAATG-3'  |
| 10           | <i>Dlx5-Chip</i>                    | Forward primer   | 5'-TGCCTACTTTTCGGTCTTCA-3'    |
|              |                                     | Reverse primer   | 5'-CTCGACTACTTGGAAGCTTC-3'    |
